# Supplementary material for: Decision Trade-Offs in Ecological Momentary Assessments and Digital Wearables Uptake: Protocol for a Discrete Choice Experiment
Source: JMIR Res Protoc. 2023 Sep 25;12:e47567. doi: 10.2196/47567 (PMC10562974; doi:10.2196/47567)
Supplement: Multimedia Appendix 1 [file resprot_v12i1e47567_app1.docx]

**Exhibit 1.** Discrete choice experiment tasks.

| **Experiment 1: Ecological momentary assessment**  *If you were asked to answer a brief survey with the following sets of characteristics, which one you would be most likely to complete?*   | **Number of surveys per day** | | 2 to 3 surveys | 6 or more surveys | None. I would not choose either of these. | | --- | --- | --- | --- | --- | | **Number of questions in each survey** | | 6 or more questions | 1 question | | **Timing of survey** | | At random times | At fixed times | | **Topic of survey** | | Exercise | Nicotine or tobacco use | | **Length of assessment** | | 1 month or shorter | One year or longer | |  | **[Choice 1]** | | **[Choice 2]** | **[Choice 3]** | |
| --- | --- | --- | --- | --- | --- | --- | --- | --- | --- | --- | --- | --- | --- | --- | --- | --- | --- | --- | --- | --- | --- | --- | --- | --- | --- | --- |
|  |
| **Experiment 2: Digital wearables**  *Choose the reason for using a wearable device that is most important to you and least important to you.*   | **Most** |  | **Least** | | --- | --- | --- | |  | The device must be charged every 48 hours |  | |  | I can enable or disable location tracking on the device |  | |  | The device is covered by health insurance |  | |  | The device is under $150 |  | |
